# Supplementary material
Source: ML conference proceedings conference paper supplement (https://proceedings.mlr.press/v80/madras18a.html)
Supplement: Supplementary file [file madras18a-supp.pdf]

## A. Understanding cross entropy loss in fair adversarial training

As established in the previous sections, we can view the purpose of the adversary’s objective function as calculating a test discrepancy between  $\mathcal{Z}_0$  and  $\mathcal{Z}_1$  for a particular adversary  $h$ . Since the adversary is trying to maximize its objective, then a close-to-optimal adversary will have objective  $L_{Adv}(h)$  close to the statistical distance between  $\mathcal{Z}_0$  and  $\mathcal{Z}_1$ . Therefore, an optimal adversary can be thought of as regularizing our representations according to their statistical distance. It is essential for our model that the adversary is incentivized to reach as high a test discrepancy as possible, to fully penalize unfairness in the learned representations and in classifiers which may be learned from them.

However, this interpretation falls apart if we use (17) (equivalent to cross entropy loss) as the objective  $L_{Adv}(h)$ , since it does *not* calculate the test discrepancy of a given adversary  $h$ . Here we discuss the problems raised by dataset imbalance for a cross-entropy objective.

Firstly, whereas the test discrepancy is the sum of conditional expectations (one for each group), the standard cross entropy loss is an expectation over the entire dataset. This means that when the dataset is not balanced (i.e.  $P(A = 0) \neq P(A = 1)$ ), the cross entropy objective will bias the adversary towards predicting the majority class correctly, at the expense of finding a larger test discrepancy.

Consider the following toy example: a single-bit representation  $Z$  is jointly distributed with sensitive attribute  $A$  according to Table 1. Consider the adversary  $h$  that predicts  $A$  according to  $\hat{A}(Z) = T(h(Z))$  where  $T(\cdot)$  is a hard threshold at

|         | $A = 0$ | $A = 1$ |
|---------|---------|---------|
| $Z = 0$ | 0.92    | 0.03    |
| $Z = 1$ | 0.03    | 0.02    |

Table 1.  $p(Z, A)$

0.5. Then if  $h$  minimizes cross-entropy, then  $h^*(0) = \frac{0.03}{0.95}$  and  $h^*(1) = \frac{0.02}{0.05}$  which achieves  $L(h) = -0.051$ . Thus every  $Z$  is classified as  $\hat{A} = 0$  which yields test discrepancy  $d_h(\mathcal{Z}_0, \mathcal{Z}_1) = 0$ . However, if we directly optimize the test discrepancy as we suggest, i.e.,  $L_{Adv}^{DP}(h) = d_h(\mathcal{Z}_0, \mathcal{Z}_1)$ ,  $h^*(Z) = Z$ , which yields  $L_{Adv}^{DP}(h) = \mathbb{E}_{A=0}[1 - h] + \mathbb{E}_{A=1}[h] - 1 = \frac{0.92}{0.95} + \frac{0.02}{0.05} - 1 \approx 0.368$  (or vice versa). This shows that the cross-entropy adversarial objective will not, in the unbalanced case, optimize the test discrepancy as well as the group-normalized  $\ell_1$  objective.

## B. Training Details

We used single-hidden-layer neural networks for each of our encoder, classifier and adversary, with 20 hidden units for the Health dataset and 8 hidden units for the Adult dataset. We also used a latent space of dimension 20 for Health and

8 for Adult. We train with  $L_C$  and  $L_{Adv}$  as absolute error, as discussed in Section 5, as a more natural relaxation of the binary case for our theoretical results. Our networks used leaky rectified linear units and were trained with Adam (Kingma & Ba, 2015) with a learning rate of 0.001 and a minibatch size of 64, taking one step per minibatch for both the encoder-classifier and the discriminator. When training CLASSLEARN in Algorithm 1 from a learned representation we use a single hidden layer network with half the width of the representation layer, i.e., g. REPRLEARN (i.e., LAFTR) was trained for a total of 1000 epochs, and CLASSLEARN was trained for at most 1000 epochs with early stopping if the training loss failed to reduce after 20 consecutive epochs.

To get the fairness-accuracy tradeoff curves in Figure 2, we sweep across a range of fairness coefficients  $\gamma \in [0.1, 4]$ . To evaluate, we use a validation procedure. For each encoder training run, model checkpoints were made every 50 epochs;  $r$  classifiers are trained on each checkpoint (using  $r$  different random seeds), and epoch with lowest median error  $+\Delta$  on validation set was chosen. We used  $r = 7$ . Then  $r$  more classifiers are trained on an unseen test set. The median statistics (taken across those  $r$  random seeds) are displayed.

For the transfer learning experiment, we used  $\gamma = 1$  for models requiring a fair regularization coefficient.

We used an  $\ell_1$  loss function for the adversary and classifier — we found using cross entropy on classifier and  $\ell_1$  on adversary to be unstable. We experimented with a WGAN-GP (Gulrajani et al., 2017) type loss (value of difference in adversary output on the two groups, plus a gradient penalty). We found these results to not be particularly different from the  $\ell_1$  results.

## C. Transfer Learning Table

Table 2. Results from Figure 3 broken out by task.  $\Delta_{EO}$  for each of the 10 transfer tasks is shown, which entails identifying a primary condition code that refers to a particular medical condition. Most fair on each task is bolded. All model names are abbreviated from Figure 3; “TarUnf” is a baseline, unfair predictor learned directly from the target data without a fairness objective.

| TRA. TASK | TARUNF | TRAUNF       | TRAFAIR      | TRAY-AF      | LAFTR        |
|-----------|--------|--------------|--------------|--------------|--------------|
| MSC2A3    | 0.362  | 0.370        | 0.381        | 0.378        | <b>0.281</b> |
| METAB3    | 0.510  | 0.579        | <b>0.436</b> | 0.478        | 0.439        |
| ARTHSPIN  | 0.280  | 0.323        | 0.373        | 0.337        | <b>0.188</b> |
| NEUMENT   | 0.419  | 0.419        | 0.332        | 0.450        | <b>0.199</b> |
| RESPR4    | 0.181  | 0.160        | 0.223        | 0.091        | <b>0.051</b> |
| MISCHRT   | 0.217  | 0.213        | 0.171        | 0.206        | <b>0.095</b> |
| SKNAUT    | 0.324  | <b>0.125</b> | 0.205        | 0.315        | 0.155        |
| GIBLEED   | 0.189  | 0.176        | 0.141        | 0.187        | <b>0.110</b> |
| INFEC4    | 0.106  | 0.042        | 0.026        | <b>0.012</b> | 0.044        |
| TRAUMA    | 0.020  | 0.028        | 0.032        | 0.032        | <b>0.019</b> |

Table 3. Transfer fairness, other metrics. Models are as defined in Figure 3. MMD is calculated with a Gaussian RBF kernel ( $\sigma = 1$ ). AdvAcc is the accuracy of a separate MLP trained on the representations to predict the sensitive attribute; due to data imbalance an adversary predicting 0 on each case obtains accuracy of approximately 0.74.

| MODEL                          | MMD                  | ADVACC       |
|--------------------------------|----------------------|--------------|
| TRANSFER-UNFAIR                | $1.1 \times 10^{-2}$ | 0.787        |
| TRANSFER-FAIR                  | $1.4 \times 10^{-3}$ | 0.784        |
| TRANSFER-Y-ADV ( $\beta = 1$ ) | $3.4 \times 10^{-5}$ | 0.787        |
| TRANSFER-Y-ADV ( $\beta = 0$ ) | $1.1 \times 10^{-3}$ | 0.786        |
| LAFTR                          | $2.7 \times 10^{-5}$ | <b>0.761</b> |

Since transfer fairness varied much more than accuracy, we break out the results of Fig. 3 in Table 2, showing the fairness outcome of each of the 10 separate transfer tasks. We note that LAFTR provides the fairest predictions on 7 of the 10 tasks, often by a wide margin, and is never too far behind the fairest model for each task. The unfair model TraUnf achieved the best fairness on one task. We suspect this is due to some of these tasks being relatively easy to solve without relying on the sensitive attribute by proxy. Since the equalized odds metric is better aligned with accuracy than demographic parity (Hardt et al., 2016), high accuracy classifiers can sometimes achieve good  $\Delta_{EO}$  if they do not rely on the sensitive attribute by proxy. Because the data owner has no knowledge of the downstream task, however, our results suggest that using LAFTR is safer than using the raw inputs; LAFTR is relatively fair even when TraUnf is the most fair, whereas TraUnf is dramatically less fair than LAFTR on several tasks.

## D. Transfer Fairness - Other Metrics

In Table 3 we present alternative fairness metrics of representation fairness. We give two metrics: maximum mean discrepancy (MMD) (Gretton et al., 2007), which is a general measure of distributional distance; and adversarial accuracy (if an adversary is given these representations, how well can it learn to predict the sensitive attribute?). In both metrics, our representations are more fair than the baselines. We give two versions of the “Transfer-Y-Adv” adversarial model ( $\beta = 0, 1$ ); note that it has much better MMD when the reconstruction term is added, but that this does not improve its adversarial accuracy, indicating that our model is doing something more sophisticated than simply matching moments of distributions.
